# Supplementary material for: Investigating the physical and electrochemical effects of cathodic polarization treatment on TaOx
Source: Royal Society of Chemistry journal article supplement (doi:10.1039/c5ta02385h), 2015-01-01
Supplement: c5ta02385h1.pdf [file c5ta02385h1.pdf]

## Supporting Information

### **Investigating the physical and electrochemical effects of cathodic polarization treatment on TaO<sub>x</sub>**

*Zaenal Awaludin, Mohd Safuan, Takeyoshi Okajima, Takeo Ohsaka\**

Department of Electronic Chemistry, Interdisciplinary Graduate School of Science and Engineering, Tokyo Institute of Technology, 4259-G1-5 Nagatsuta, Midori-ku, Yokohama 226-8502, Japan.

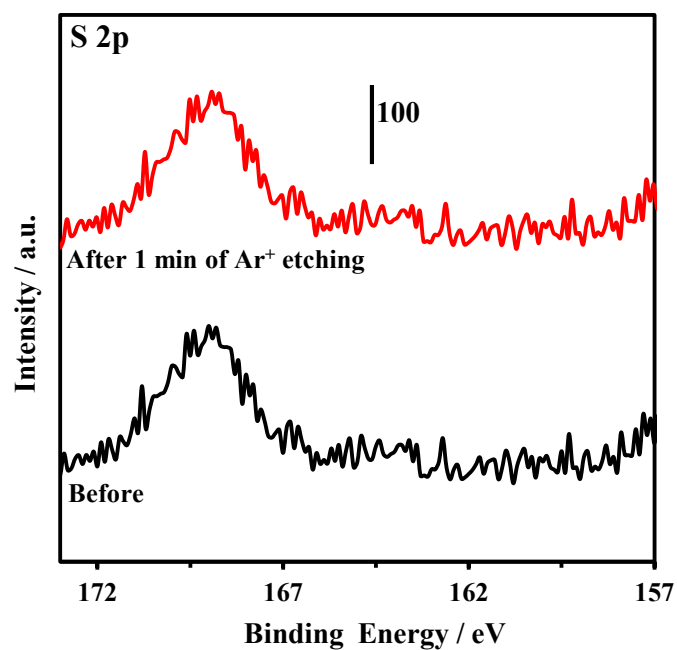

**Fig. S1** S 2p XPS spectra obtained at the bare GC electrode treated by the electrochemical reduction treatment for 30 cycles before and after 1 min of Ar<sup>+</sup> bombardment. This result shows no adsorption of sulfate on the bare GC surface after the electrochemical treatment.

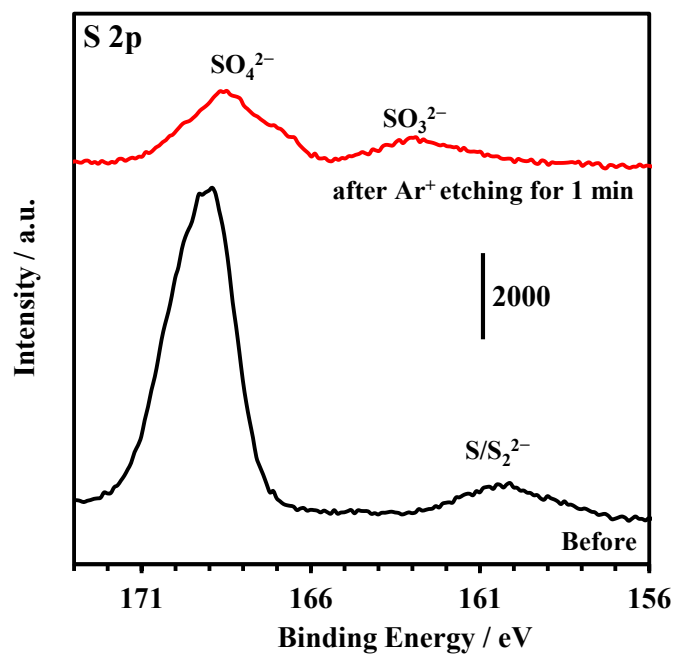

**Fig. S2** S 2p XPS spectra obtained at the TaO<sub>x</sub>/GC electrode treated by the CV treatment for 30 cycles before and after Ar<sup>+</sup> etching for 1 min.

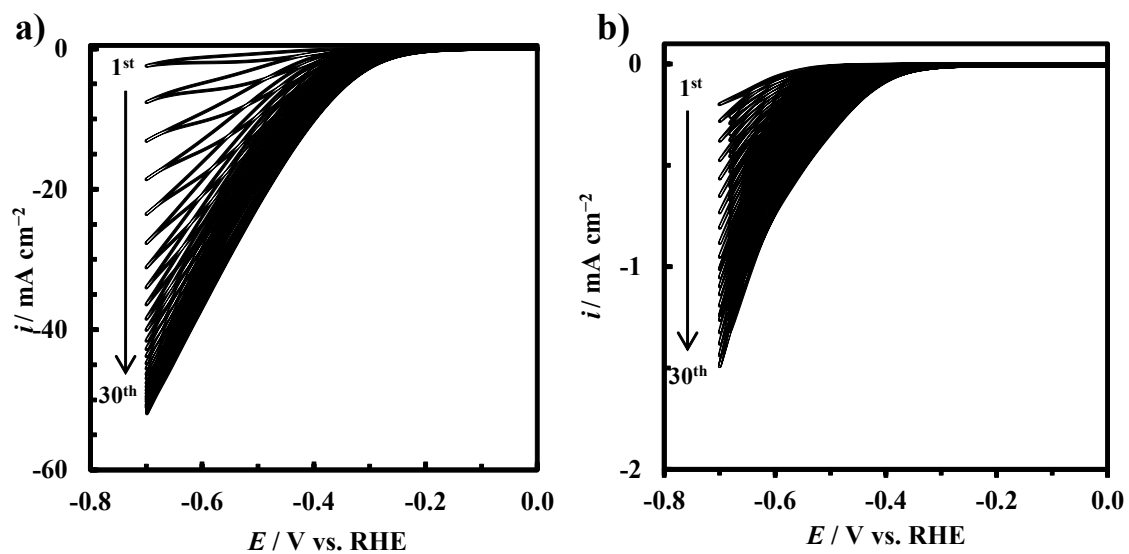

**Fig. S3** CVs obtained at the  $\text{TaO}_x/\text{GC}$  (a) and bare GC (b) electrodes in  $\text{N}_2$ -saturated 2 M  $\text{H}_2\text{SO}_4$  at scan rate  $20 \text{ mV s}^{-1}$ .

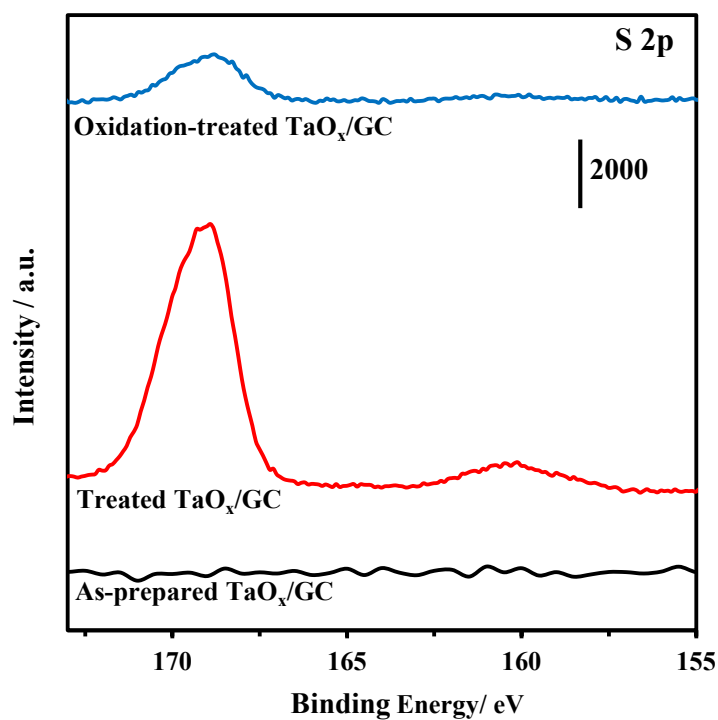

**Fig. S4** S 2p XPS spectra obtained at the TaO<sub>x</sub>/GC electrode before (bottom) and after the CV treatment for 30 cycles (mid), and then followed with oxidation by potential cycling between  $-0.2$  V and  $1.23$  V in N<sub>2</sub>-saturated  $0.5$  M H<sub>2</sub>SO<sub>4</sub> at scan rate of  $50$  mV s<sup>-1</sup> for 10 cycles (top).

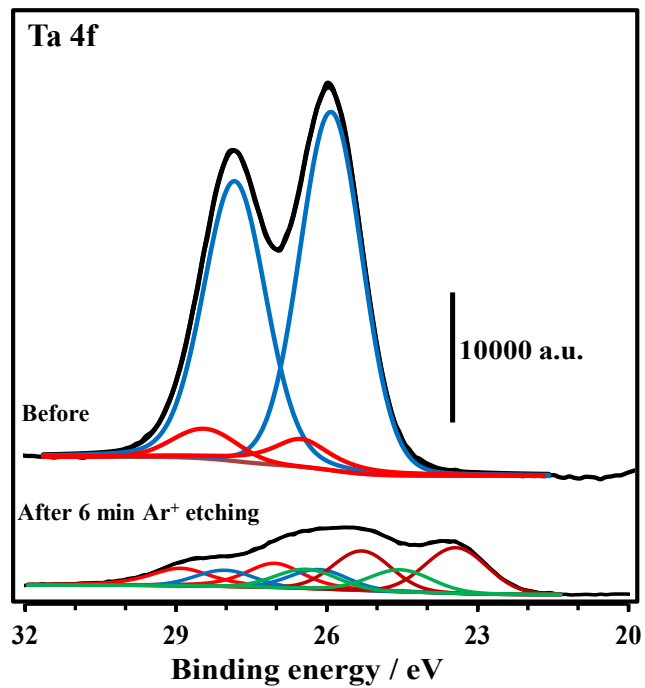

**Fig. S5** Ta 4f XPS spectra obtained at the TaO<sub>x</sub>/GC electrode treated by the CV treatment for 1000 cycles before and after Ar<sup>+</sup> etching for 6 min.
